# Supplementary material for: Divorced Mothers Brain Connectivity: A Preliminary Study
Source: Research Square preprint supplement (doi:10.21203/rs.3.rs-8689220/v1), 2026-01-29
Supplement: Supplementary file 1 [file e700d667dae573c1e1dfeba7.docx]

Supplementary Table 1: DASS-21 Cutoff Points

| **Category** | **Stress** | **Anxiety** | **Depression** |
| --- | --- | --- | --- |
| Normal | 0-14 | 0-7 | 0-9 |
| Mild | 15-18 | 8-9 | 10-13 |
| Moderate | 19-25 | 10-14 | 14-20 |
| Severe | 26-33 | 15-19 | 21-27 |
| Extremely Severe | 34 and above | 20 and above | 28 and above |
